# Supplementary material for: Catalytic hydrogenation of CO2 to methane over supported Pd, Rh and Ni catalysts
Source: Royal Society of Chemistry journal article supplement (doi:10.1039/c6cy02536f), 2017-01-01
Supplement: c6cy02536f1.pdf [file c6cy02536f1.pdf]

Cite this: DOI: 10.1039/xxxxxxxxxx

## Supplementary Information for Article: Catalytic hydrogenation of CO<sub>2</sub> to methane over supported Pd, Rh and Ni catalysts

Natalia M. Martin,<sup>\*a</sup> Peter Velin,<sup>a</sup> Magnus Skoglundh,<sup>a</sup> Matthias Bauer,<sup>b</sup> and Per-Anders Carlsson<sup>a</sup>

Received Date  
Accepted Date

DOI: 10.1039/xxxxxxxxxx

www.rsc.org/journalname

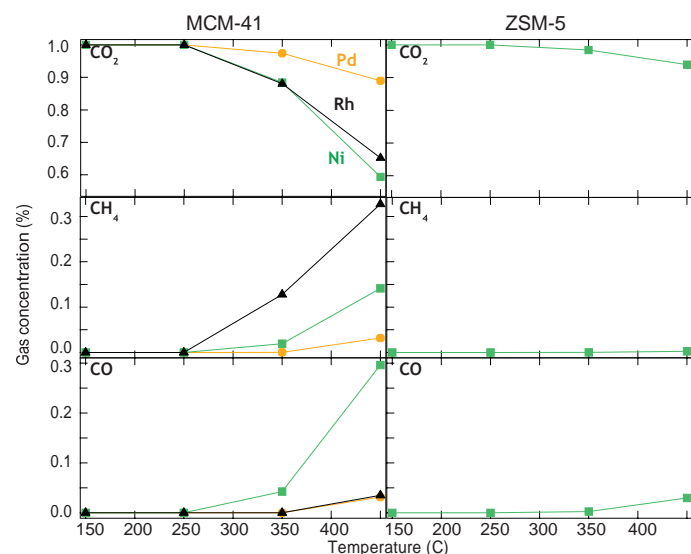

**Fig. S1** Steady-state outlet concentration of CO<sub>2</sub> (top), CH<sub>4</sub> (middle) and CO (bottom) as a function of temperature during the reaction between 1 % CO<sub>2</sub> and 5 % H<sub>2</sub> in Ar gas with a total flow rate of 2000 ml/min at atmospheric pressure over the Pd (orange), Ni (green) and Rh (black) catalysts supported on MCM-41 (left panel) and over the Ni/ZSM-5 (right panel) catalyst.

Figure S1 shows the catalytic performance of the metal-promoted MCM-41 and ZSM-5 catalysts for CO<sub>2</sub> hydrogenation. The inlet gas concentrations to the flow reactor are 1% CO<sub>2</sub> and 5% H<sub>2</sub> in Ar and each marker in the figure represents the calculated average value over a 10 min period. The main reaction products formed during CO<sub>2</sub> hydrogenation are CH<sub>4</sub>, CO and H<sub>2</sub>O. No hy-

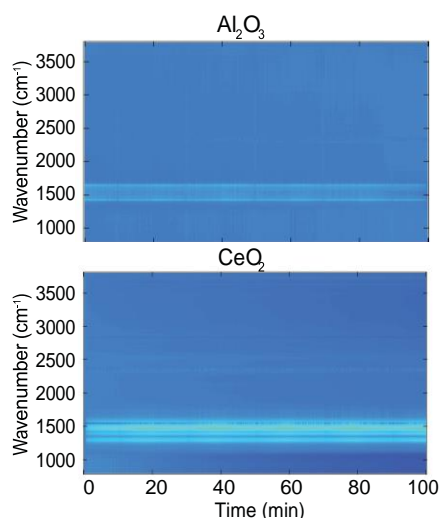

**Fig. S2** Transient hydrogenation of 0.2% CO<sub>2</sub> over Al<sub>2</sub>O<sub>3</sub> (upp) and CeO<sub>2</sub> (bottom) during periodic variation of the feed gas composition between 0.8% H<sub>2</sub>+0.2% CO<sub>2</sub> and 0.2% CO<sub>2</sub> at 350 °C for 10 min. The panels show the color coded intensities (blue corresponds to low intensity, red to high intensity) of the IR bands in the region 790-3800 cm<sup>-1</sup> versus time.

drocarbon compounds except methane are observed.

Figure S2 shows the DRIFTS results for the hydrogen pulse experiments under a continuous flow of CO<sub>2</sub> for alumina and ceria at 350 °C.

<sup>a</sup> Competence Centre for Catalysis, Chalmers University of Technology, Gothenburg, 412 96, Sweden Fax: +46 31 160062; Tel: +46 31 772 29 04; E-mail: Natalia.Martin@chalmers.se

<sup>b</sup> Department of Chemistry, Paderborn University, 33098 Paderborn, Germany.
